# Supplementary material for: DNA Methylation Signatures Correlate with Response to Immune Checkpoint Inhibitors in Metastatic Melanoma
Source: Springer Nature journal article supplement (doi:10.1007/s11523-024-01041-4), 2024-02-24
Supplement: MOESM1 [file 26776650]

## **DNA methylation signatures correlate with response to immune checkpoint inhibitors in metastatic melanoma**

Julia Maria Ressler<sup>1</sup>, Erwin Tomasich<sup>2,4</sup>, Teresa Hatzioannou<sup>2,4</sup>, Helmut Ringl<sup>3</sup>, Gerwin Heller<sup>4</sup>, Rita Silmbrod<sup>1</sup>, Lynn Gottmann<sup>2,4</sup>, Angelika Martina Starzer<sup>4</sup>, Nina Zila<sup>1,5</sup>, Philipp Tschandl<sup>1</sup>, Christoph Höller<sup>1</sup>, Matthias Preusser<sup>2,4</sup>, Anna Sophie Berghoff<sup>2,4</sup>

- (1) Medical University of Vienna, Department of Dermatology, Vienna, Austria
- (2) Medical University of Vienna, Christian Doppler Laboratory for Personalized Immunotherapy, Department of Medicine I, Vienna, Austria
- (3) Wiener Gesundheitsverbund, Klinik Donaustadt, Vienna, Austria
- (4) Medical University of Vienna, Division of Oncology, Department of Medicine I, Vienna, Austria
- (5) University of Applied Sciences FH Campus Wien, Division of Biomedical Science, Vienna, Austria

Corresponding Author:

Anna Sophie Berghoff, MD

Division of Oncology & Christian Doppler Laboratory for Personalized Immunotherapy

Department of Medicine I

Medical University of Vienna

Waehringer Guertel 18-20

1090 Vienna, Austria

Phone number: +43 1 40 400 44450

E-mail: [anna.berghoff@meduniwien.ac.at](mailto:anna.berghoff@meduniwien.ac.at)

## SUPPLEMENTARY TABLE

### Patient's clinical and tumor characteristics from patients with tumor tissue derived from different body sites

|                                                                                |                         |
|--------------------------------------------------------------------------------|-------------------------|
| <b>Sex (n; %)</b>                                                              |                         |
| Female                                                                         | 4 (50.0%)               |
| Male                                                                           | 4 (50.0%)               |
| <b>Age (years)</b>                                                             |                         |
| Median                                                                         | 78 (range: 54-81 years) |
| <b>Mutation status (n; %)</b>                                                  |                         |
| BRAF                                                                           | 2 (25.0%)               |
| NRAS                                                                           | 2 (25.0%)               |
| cKIT                                                                           | 1 (12.5%)               |
| wt                                                                             | 3 (39.0%)               |
| <b>Baseline ECOG (n; %)</b>                                                    |                         |
| 0                                                                              | 7 (87.5%)               |
| 1                                                                              | 1 (12.5%)               |
| <b>Baseline LDH (U/L)</b>                                                      |                         |
| normal                                                                         | 6 (25.0%)               |
| >ULN                                                                           | 2 (75.0%)               |
| <b>Baseline S100 (ug/L)</b>                                                    |                         |
| normal                                                                         | 4 (50.0%)               |
| > ULN                                                                          | 4 (50.0%)               |
| <b>Origin of treatment-naïve tumor tissue for methylation profiling (n; %)</b> |                         |
| Primary tumor and organ metastatic lesion                                      | 1 (12.5%)               |
| Primary tumor and lymph node metastatic lesion                                 | 2 (25.0%)               |
| Cutaneous and lymph node metastatic lesion                                     | 3 (37.5%)               |
| Primary tumor and cutaneous metastatic lesion                                  | 1 (12.5%)               |
| Primary tumor, cutaneous and lymph node metastatic lesion                      | 1 (12.5%)               |
| <b>First-line IO (n; %)</b>                                                    |                         |
| Nivolumab monotherapy                                                          | 4 (50.0%)               |
| Pembrolizumab monotherapy                                                      | 1 (12.5%)               |
| Nivolumab and ipilimumab                                                       | 3 (39.0%)               |
| <b>iBOR according to iRECIST (n; %)</b>                                        |                         |
| iCR                                                                            | 1 (12.5%)               |
| iPD (iUPD or iCPD)                                                             | 7 (87.5%)               |

**Table S1. Patient's clinical and tumor characteristics from patients with tumor tissue derived from different body sites.**

Wildtype (wt); lactate dehydrogenase (LDH); upper limit of normal (ULN); not applicable (NA); Eastern Cooperative Oncology Group (ECOG) performance status; Immunotherapy (IO); Response was classified according to immune-based Response Evaluation Criteria in Solid Tumors (iRECIST): best overall response (iBOR), immune complete response (iCR); immune partial response (iPR), immune stable disease

(iSD), immune progressive disease (iPD); immune unconfirmed progressive disease (iUPD); immune confirmed progressive disease (iCPD).

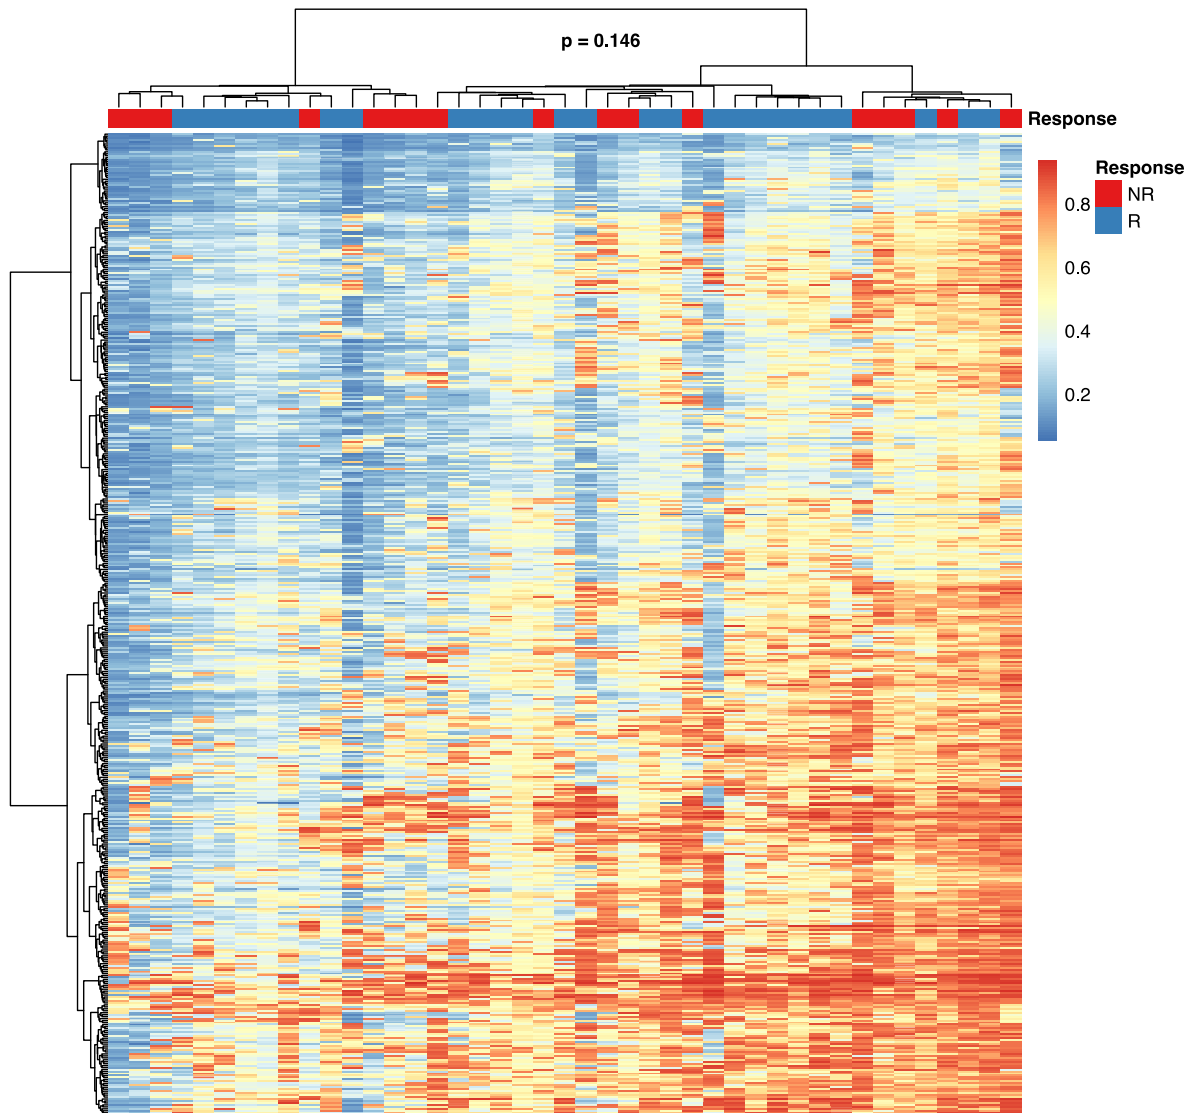

**Figure S1. Methylation signature-based response to immune checkpoint inhibitors in metastatic melanoma of an independent validation cohort. A)** Heatmap demonstrating three clusters based on the top 500 DMPs of the discovery cohort. Responders (R), non-responders (NR). Beta values ranging from 0 (blue) to 1 (red) are shown.
